# Supplementary material
Source: PubMed Central journal article supplement (PMC2504872)

### **Supplementary Figure 1**

#### **DMPKS and DT960 are expressed efficiently in C2C12 cells.**

DMPKS, DT960 and a control plasmid with no DMPK sequences (eGFP) were transfected into C2C12 cells. After 24 hr, total levels of DMPK-related mRNA were assessed by qRT-PCR using primers that recognize both the mouse and human DMPK genes and normalized to GAPDH mRNA levels. The DMPK primer sequences were DMPK-F 5'-CGGATCCACCTTCCCATCTA-3' and DMPK-R 5'-GGCAGGGAGCAGCAGGTG-3'

### **Supplementary Figure 2**

#### **Transient siRNA-mediated depletion of CUGBP1 results in stabilization of TNF mRNA.**

C2C12 cells were transfected with either a control siRNA, transfection reagent alone, or an siRNA directed against CUGBP1. A: CUGBP1 protein levels were determined by western blot. GAPDH was used as a loading control. B: Decay of TNF mRNA was assessed by qRT-PCR.

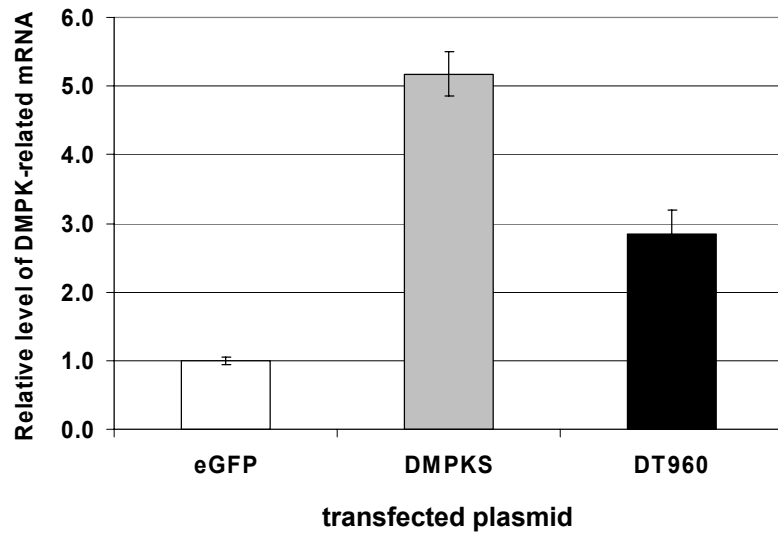

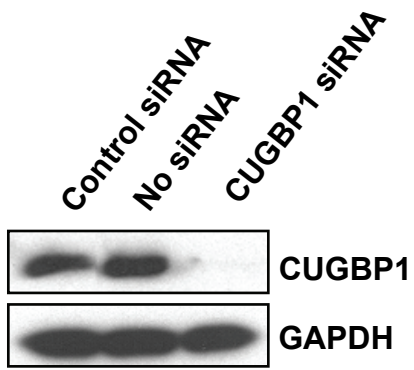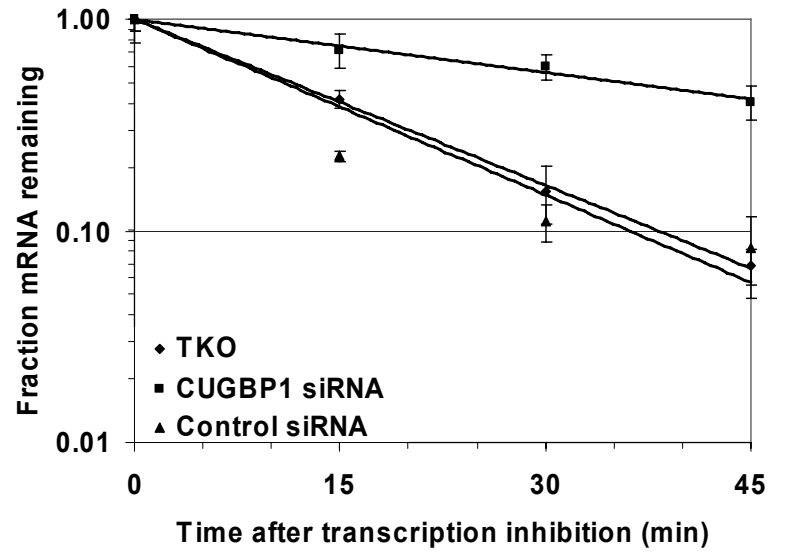

Supplement: M802803200_1.pdf [file M802803200_1.pdf]
